# Supplementary material for: Unveiling a hotspot of genetic diversity in southern Italy for the endangered Hermann’s tortoise Testudo hermanni
Source: Research Square preprint supplement (doi:10.21203/rs.3.rs-1669435/v1), 2022-08-29

**Supplement to: Unveiling a hotspot of genetic diversity in southern Italy for the endangered Hermann’s tortoise *Testudo hermanni***

**Additional file 1 – Supplementary results from the TESS Analysis.**

Bar plots showing the admixture proportions of each individual for the genetic clusters recovered in the Bayesian clustering analysis performed on TESS, setting the number of genetic clusters (K) from 2 to 9; each colour represents a different clusters. Details are provided in the main text.

**K = 2**


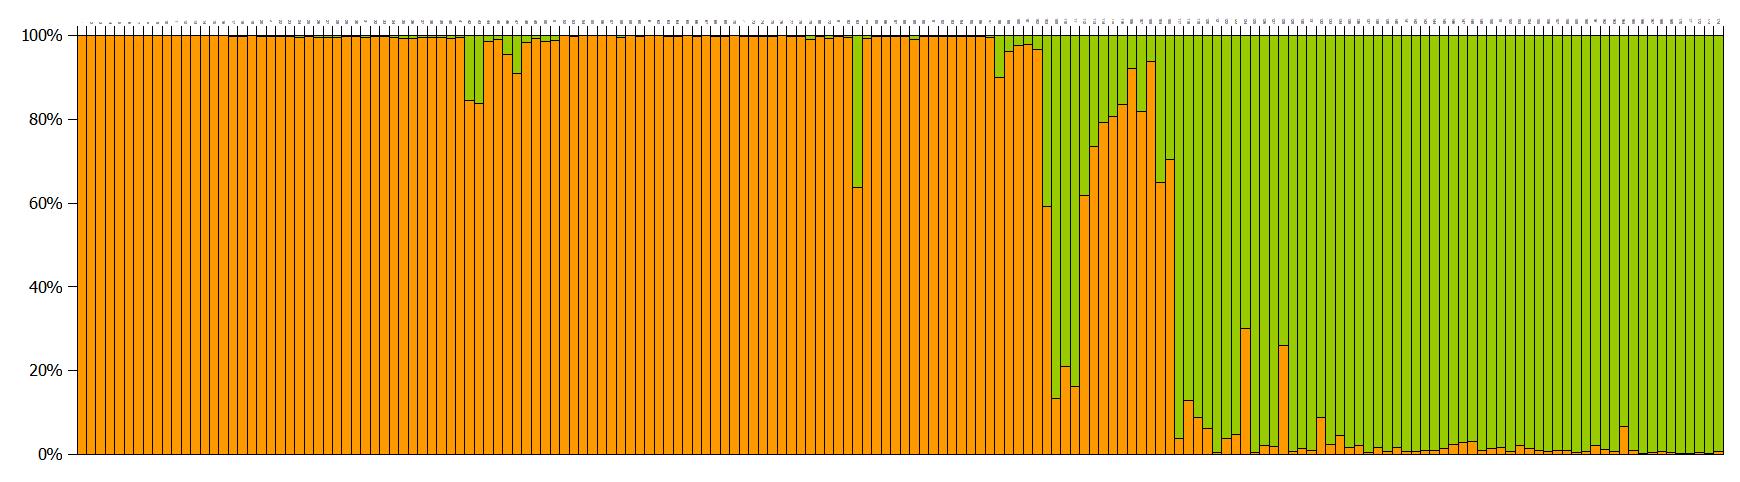


**K = 3**


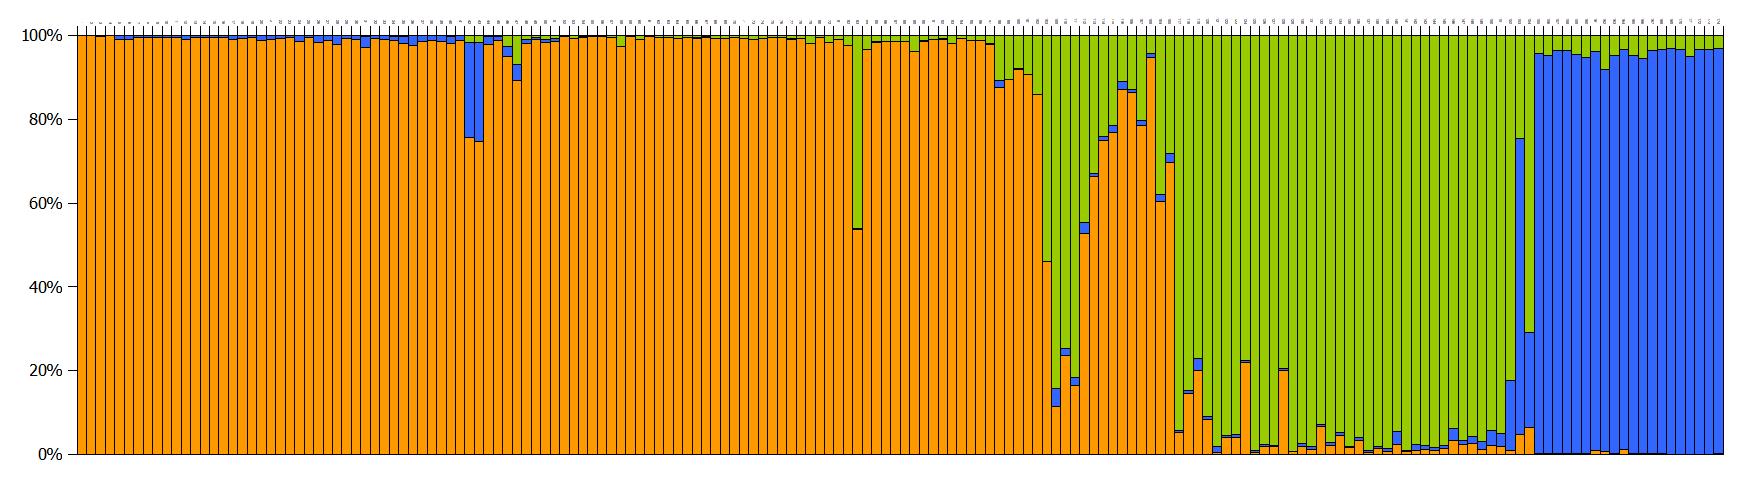


**K = 4**


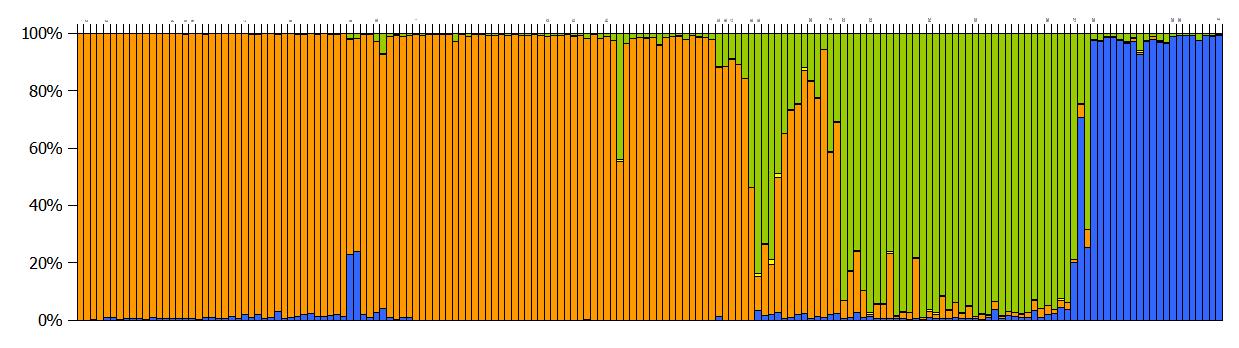


**K = 5**


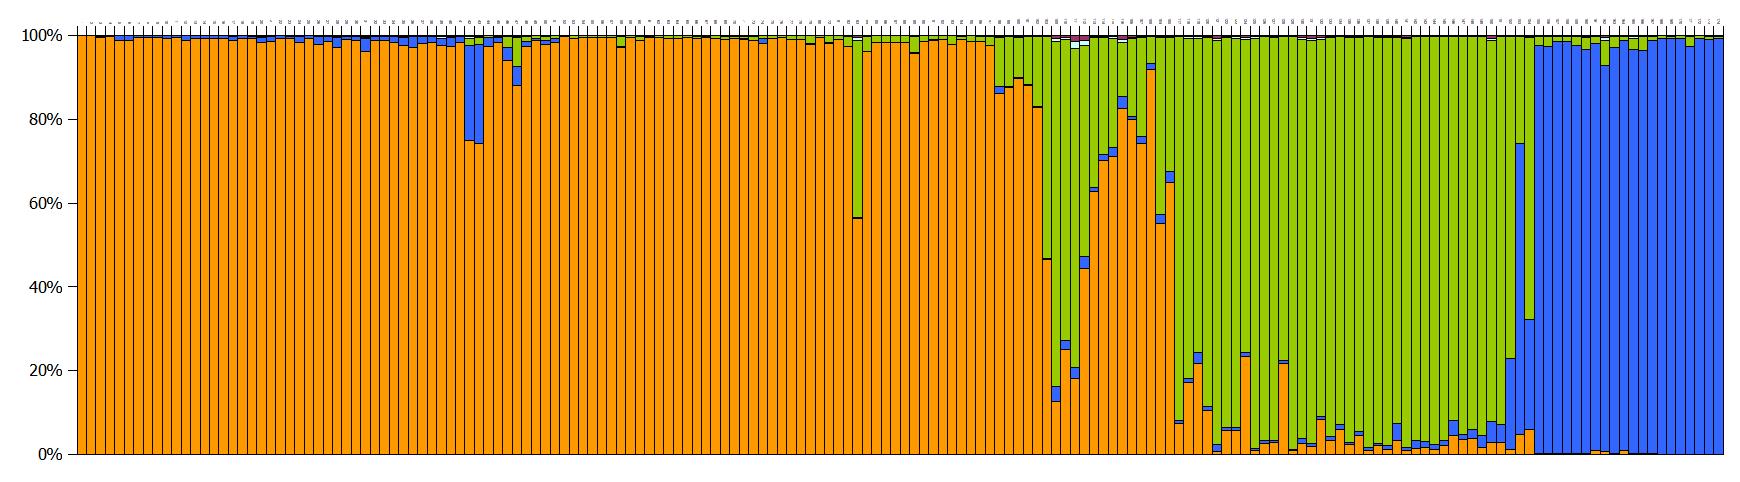


**K = 6**


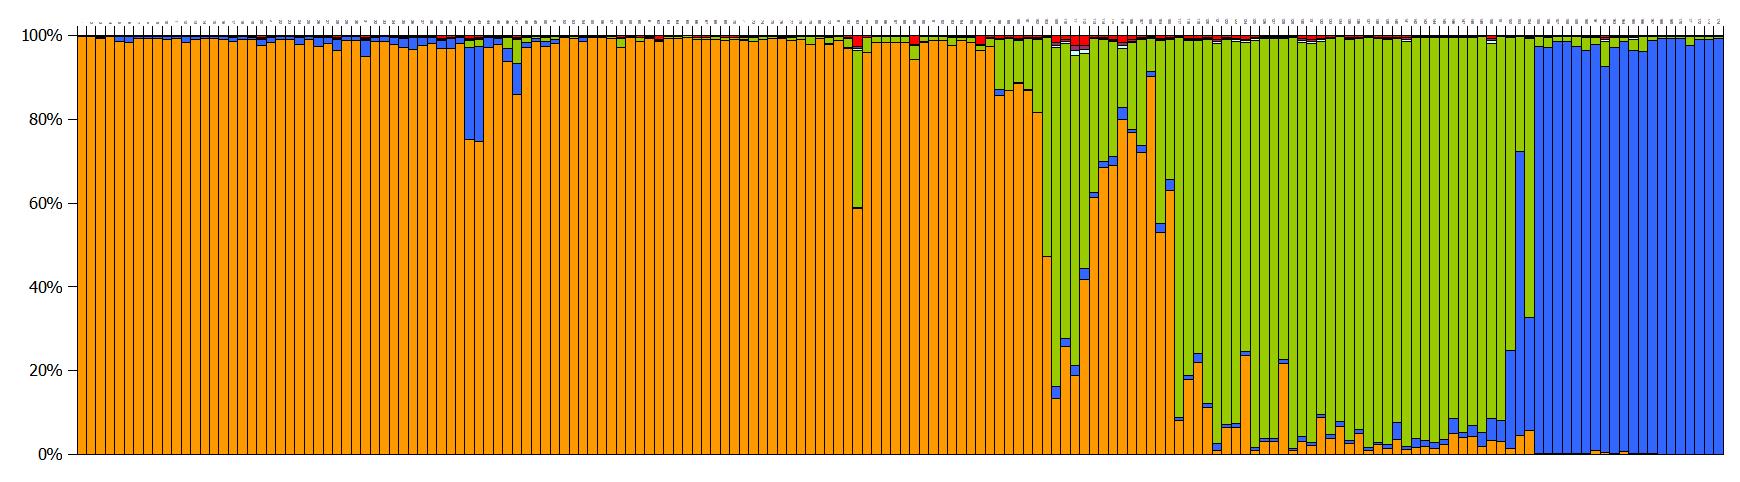


**K = 7**


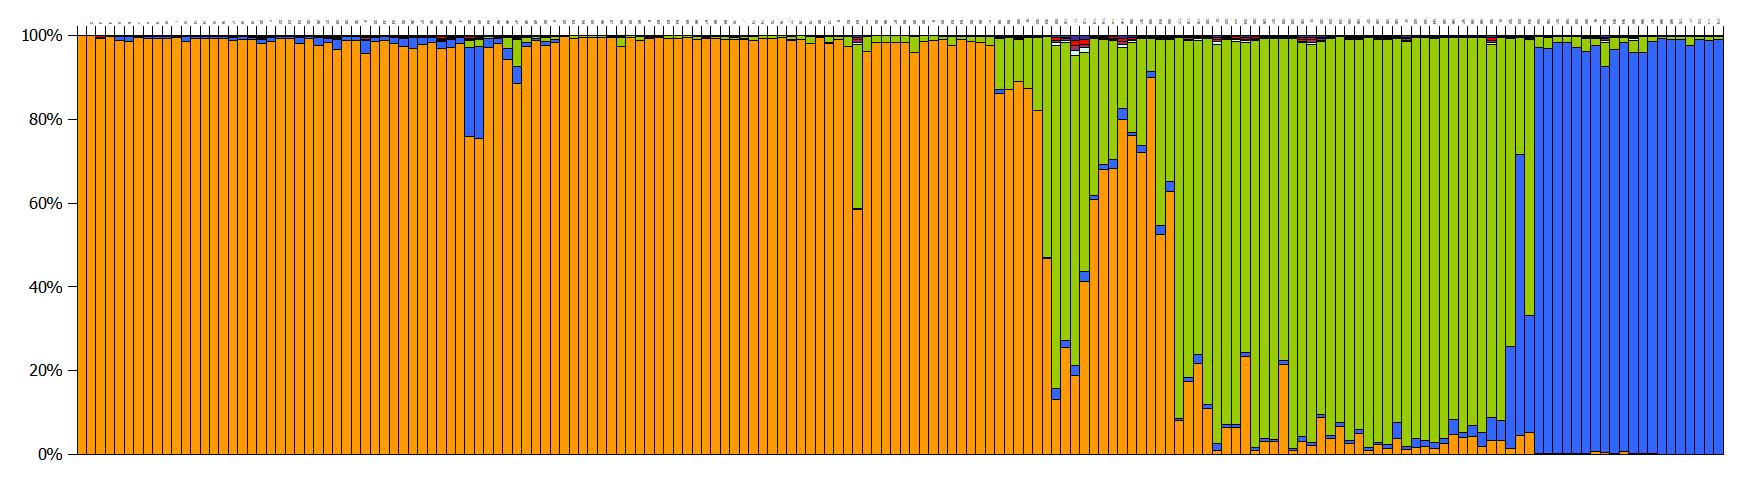


**K = 8**


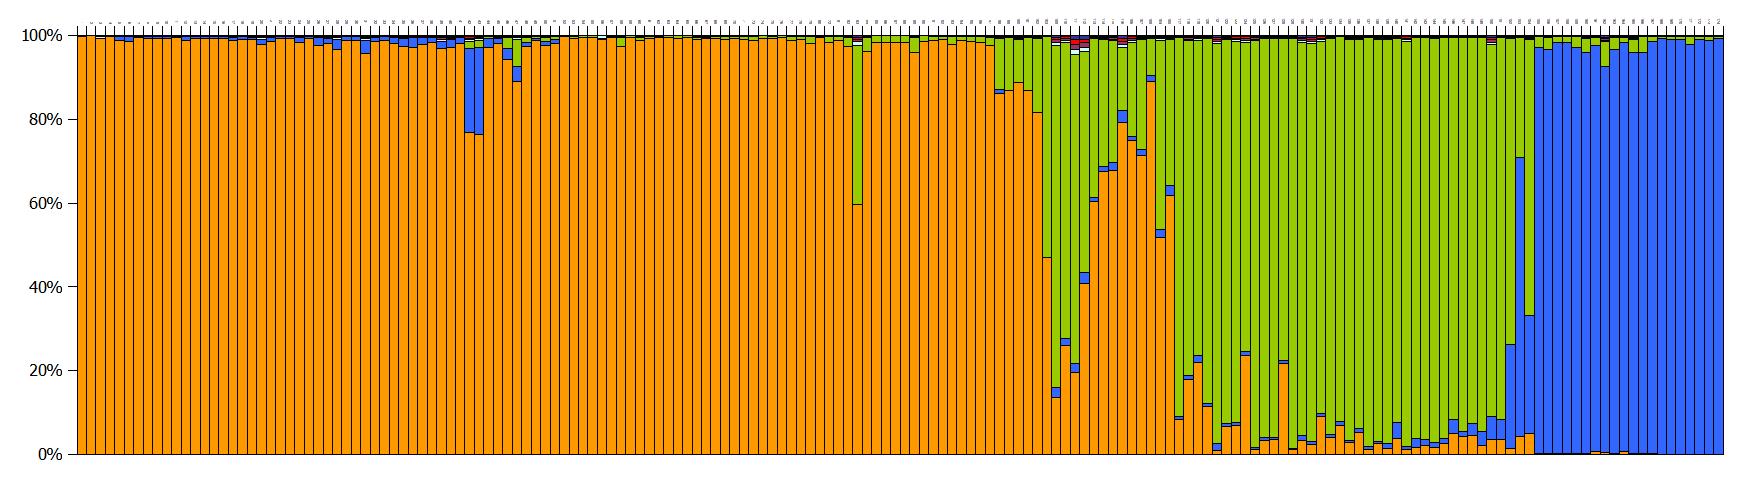


**K = 9**


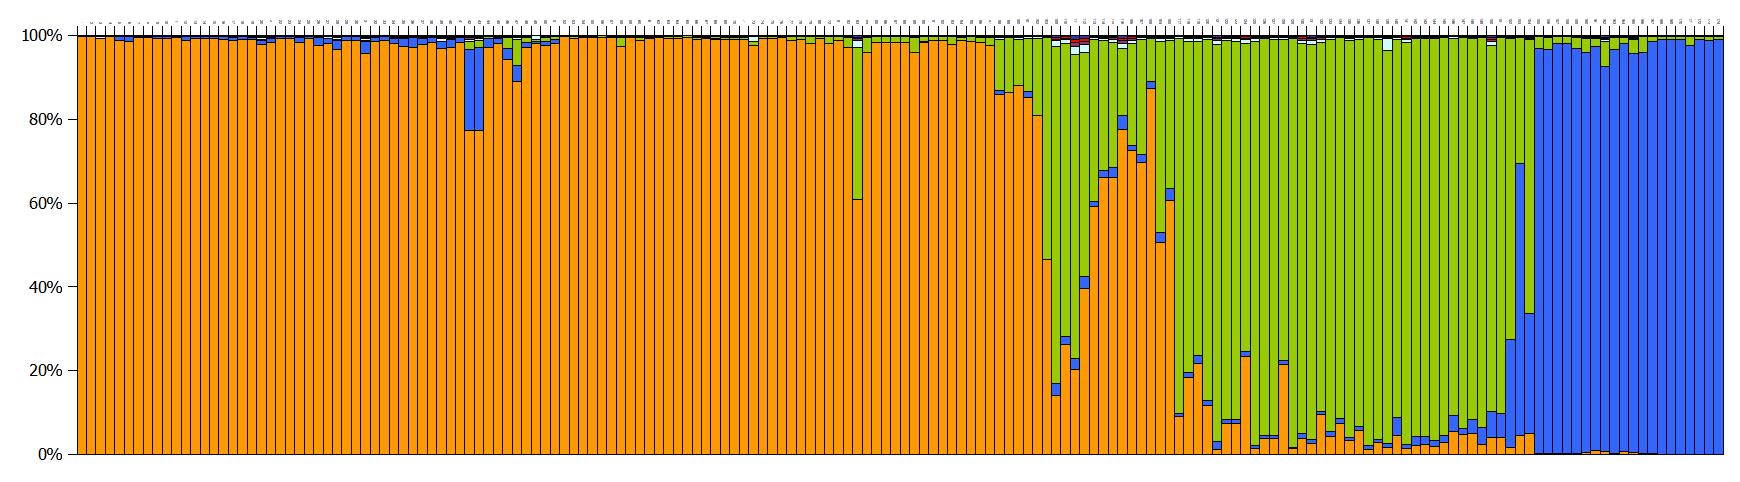

Supplement: Supplementary file 1 [file 08db6311f0b51c6e6066b61c.docx]
